# Supplementary material
Source: publisher site journal article supplement (http://kjim.org/upload/media/kjim-2022-401-Supplementary-Table-2.pdf)
Supplement: Supplementary file 1 [file kjim-2022-401-Supplementary-Table-2.pdf]

**Supplementary Table 2. Comparison of long-term outcomes between study group and historical group**

|                           | 2-year RFS, % | 2-year OS, % | 4-year RFS, % | 4-year OS, % |
|---------------------------|---------------|--------------|---------------|--------------|
| Rituximab including group |               |              |               |              |
| Overall patients          | 55.3          | 60.8         | 40.2          | 48.0         |
| Ph-positive               | 60.7          | 73.3         | 52.1          | 52.3         |
| Ph-negative               | 50.4          | 51.5         | 35.7          | 43.2         |
| Historical group          |               |              |               |              |
| Overall patients          | 39.7          | 45.1         | 30.9          | 32.9         |
| Ph-positive               | 60.9          | 56.7         | 40.6          | 45.3         |
| Ph-negative               | 34.4          | 42.1         | 27.3          | 30.0         |

RFS, relapse-free survival; OS, overall survival; Ph, Philadelphia.
